# Supplementary material for: Testing methods to mitigate Caribbean yellow-band disease on Orbicella faveolata
Source: PeerJ. 2018 May 11;6:e4800. doi: 10.7717/peerj.4800 (PMC5951125; doi:10.7717/peerj.4800)
Supplement: Supplemental Information 2 [file peerj-06-4800-s002.xlsx]

## Sheet: Objective 1
ID	Coral ID	Band	Replicate measuremnet	March 2015 measurement (cm)	October 2015 measurement (cm)	Progression (cm)
1	Shade coral 1	Control 1	1	5.792	6.74	0.948
2	Shade coral 1	Control 1	2	7.091	9.063	1.972
3	Shade coral 1	Control 1	3	4.527	6.681	2.154
4	Shade coral 1	Shade band	1	1.966	4.372	2.406
5	Shade coral 1	Shade band	2	1.893	4.588	2.695
6	Shade coral 1	Shade band	3	1.456	4.734	3.278
7	Shade coral 2	Control 1	1	11.563	14.529	2.966
8	Shade coral 2	Control 1	2	11.05	16.994	5.944
9	Shade coral 2	Control 1	3	3.889	8.697	4.808
10	Shade coral 2	Control 1	4	1.844	6.036	4.192
11	Shade coral 2	Control 2	1	2.58	3.456	0.876
12	Shade coral 2	Control 2	2	0.636	1.911	1.275
13	Shade coral 2	Control 2	3	2.002	3.636	1.634
14	Shade coral 2	Shade band	1	2.143	3.195	1.052
15	Shade coral 2	Shade band	2	2.163	4.47	2.307
16	Shade coral 2	Shade band	3	2.207	4.55	2.343
17	Shade coral 3	Control 1	1	2.792	4.071	1.279
18	Shade coral 3	Control 1	2	1.772	5.683	3.911
19	Shade coral 3	Control 1	3	3.401	5.682	2.281
20	Shade coral 3	Control 1	4	3.933	6.575	2.642
21	Shade coral 3	Control 2	1	1.995	3.78	1.785
22	Shade coral 3	Control 2	2	1.808	3.533	1.725
23	Shade coral 3	Control 2	3	1.452	5.638	4.186
24	Shade coral 3	Control 2	4	0	4.343	4.343
25	Shade coral 3	Control 2	5	4.71	5.968	1.258
26	Shade coral 3	Control 2	6	0.678	2.437	1.759
27	Shade coral 3	Shade band	1	2.499	8.02	5.521
28	Shade coral 3	Shade band	2	4.997	9.84	4.843
29	Shade coral 3	Shade band	3	7.698	12.203	4.505
30	Shade coral 3	Shade band	4	6.388	11.627	5.239
31	Aspirated coral 1	Aspirated band	1	2.98	4.04	1.06
32	Aspirated coral 1	Aspirated band	2	8.207	9.535	1.328
33	Aspirated coral 1	Aspirated band	3	9.903	11.231	1.328
34	Aspirated coral 1	Aspirated band	4	5.152	5.515	0.363
35	Aspirated coral 2	Aspirated band	1	3.994	8.958	4.964
36	Aspirated coral 2	Aspirated band	2	3.786	8.928	5.142
37	Aspirated coral 2	Aspirated band	3	3.857	10.471	6.614
38	Aspirated coral 3	Aspirated band	1	1.855	3.922	2.067
39	Aspirated coral 3	Aspirated band	2	1.464	3.125	1.661
40	Aspirated coral 3	Aspirated band	3	1.935	3.311	1.376
41	Aspirated coral 3	Aspirated band	4	0.905	2.669	1.764
42	Aspirated coral 3	Aspirated band	5	0	1.498	1.498
43	Chisel coral 1	Chisel band	1	1.717	3.486	1.769
44	Chisel coral 1	Chisel band	2	2.408	2.29	-0.118
45	Chisel coral 1	Chisel band	3	2.879	3.587	0.708
46	Chisel coral 1	Chisel band	4	3.386	4.227	0.841
47	Chisel coral 2	Chisel band	1	3.686	7.561	3.875
48	Chisel coral 2	Chisel band	2	3.852	7.242	3.39
49	Chisel coral 2	Chisel band	3	3.519	6.729	3.21
50	Chisel coral 2	Chisel band	4	2.735	6.907	4.172
51	Chisel coral 3	Chisel band	1	4.298	8.128	3.83
52	Chisel coral 3	Chisel band	2	3.997	8.128	4.131
53	Chisel coral 3	Chisel band	3	3.7	8.099	4.399
54	Chisel coral 3	Chisel band	4	3.533	7.532	3.999

## Sheet: Objective 2
UIN	Coral ID	Initial Chisel Period	Treatment	Band	Replicate measuremnet	March 2015 measurement (cm)	February 2017 measurement (cm)	Progression (cm)
1	122	Oct-15	Chisel	chisel1	1	5.008	6.401	1.393
2	122	Oct-15	Chisel	chisel1	2	6.404	8.187	1.783
3	122	Oct-15	Chisel	chisel1	3	6.446	8.23	1.784
4	122	Oct-15	Chisel	chisel1	4	3.875	7.663	3.788
5	123	Oct-15	Chisel	chisel1	1	3.487	4.967	1.48
6	123	Oct-15	Chisel	chisel1	2	4.074	5.479	1.405
7	123	Oct-15	Chisel	chisel1	3	3.792	5.41	1.618
8	123	Oct-15	Chisel	chisel1	4	7.078	7.153	0.075
9	123	Oct-15	Chisel	chisel2	1	3.868	6.892	3.024
10	123	Oct-15	Chisel	chisel2	2	5.618	7.05	1.432
11	123	Oct-15	Chisel	chisel2	3	5.075	6.403	1.328
12	123	Oct-15	Chisel	chisel2	4	5.138	5.155	0.017
13	123	Oct-15	Control	Control1	1	4.914	7.773	2.859
14	123	Oct-15	Control	Control1	2	8.417	9.504	1.087
15	123	Oct-15	Control	Control1	3	5.437	7.693	2.256
16	124	Oct-15	Chisel	chisel1	1	2.877	7.581	4.704
17	124	Oct-15	Chisel	chisel1	2	0.916	4.413	3.497
18	124	Oct-15	Chisel	chisel1	3	1.105	4.862	3.757
19	124	Oct-15	Chisel	chisel1	4	2.575	5.717	3.142
20	124	Oct-15	Control	Control1	1	7.02	9.928	2.908
21	124	Oct-15	Control	Control1	2	6.665	10.315	3.65
22	124	Oct-15	Control	Control1	3	6.606	10.318	3.712
23	124	Oct-15	Control	Control1	4	8.395	10.058	1.663
24	126	Oct-15	Chisel	chisel1	1	3.366	6.985	3.619
25	126	Oct-15	Chisel	chisel1	2	6.163	8.463	2.3
26	126	Oct-15	Chisel	chisel1	3	7.216	9.707	2.491
27	126	Oct-15	Chisel	chisel1	4	6.922	9.229	2.307
28	126	Oct-15	Control	Control1	1	2.255	4.364	2.109
29	126	Oct-15	Control	Control1	2	2.12	7.447	5.327
30	126	Oct-15	Control	Control1	3	2.579	4.133	1.554
31	127	Oct-15	Chisel	chisel1	1	1.286	3.997	2.711
32	127	Oct-15	Chisel	chisel1	2	1.153	4.382	3.229
33	128	Oct-15	Control	control1	1	6.044	10.313	4.269
34	128	Oct-15	Control	control1	2	8.297	11.228	2.931
35	128	Oct-15	Control	control1	3	6.211	9.968	3.757
36	128	Oct-15	Control	control1	4	1.821	9.128	7.307
37	128	Oct-15	Chisel	chisel1	1	3.679	10.6	6.921
38	128	Oct-15	Chisel	chisel1	2	3.811	8.496	4.685
39	128	Oct-15	Chisel	chisel1	3	3.723	8.936	5.213
40	128	Oct-15	Chisel	chisel1	4	3.372	9.416	6.044
41	129a	Oct-15	Chisel	chisel1	1	4.091	5.858	1.767
42	129a	Oct-15	Chisel	chisel1	2	3.391	6.191	2.8
43	129a	Oct-15	Chisel	chisel1	3	3.762	6.77	3.008
44	129a	Oct-15	Chisel	chisel1	4	5.277	9.488	4.211
45	129b	Oct-15	Chisel	chisel1	1	4.143	5.468	1.325
46	129b	Oct-15	Chisel	chisel1	2	5.126	6.634	1.508
47	129b	Oct-15	Chisel	chisel1	3	4.567	9.175	4.608
48	129b	Oct-15	Chisel	chisel1	4	5.416	8.94	3.524
49	130a	Oct-15	Control	control1	1	5.446	10.98	5.534
50	130a	Oct-15	Control	control1	2	4.944	9.487	4.543
51	130a	Oct-15	Control	control1	3	5.291	10.371	5.08
52	130a	Oct-15	Control	control1	4	6.597	10.265	3.668
53	130b	Oct-15	Chisel	chisel1	1	0.298	3.883	3.585
54	130b	Oct-15	Chisel	chisel1	2	0.484	3.799	3.315
55	130b	Oct-15	Chisel	chisel1	3	0.335	4.762	4.427
56	130b	Oct-15	Chisel	chisel1	4	2.57	5.386	2.816
57	130b	Oct-15	Control	control1	1	5.418	14.214	8.796
58	130b	Oct-15	Control	control1	2	5.122	15.271	10.149
59	130b	Oct-15	Control	control1	3	5.008	21.581	16.573
60	130b	Oct-15	Control	control1	4	6.685	23.125	16.44
61	131	Oct-15	Chisel	chisel1	1	2.639	2.349	-0.29
62	131	Oct-15	Chisel	chisel1	2	3.562	4.68	1.118
63	131	Oct-15	Chisel	chisel1	3	3.312	5.443	2.131
64	131	Oct-15	Chisel	chisel1	4	3.384	6.18	2.796
65	131	Oct-15	Control	control1	1	1.946	3.23	1.284
66	131	Oct-15	Control	control1	2	3.059	5.318	2.259
67	131	Oct-15	Control	control1	3	3.03	6.18	3.15
68	131	Oct-15	Control	control1	4	2.701	6.312	3.611
69	12	Jul-15	Chisel	chisel1	1	4.452	4.876	0.424
70	12	Jul-15	Chisel	chisel1	2	2.594	5.957	3.363
71	12	Jul-15	Chisel	chisel1	3	2.599	4.618	2.019
72	12	Jul-15	Chisel	chisel2	1	2.053	6.338	4.285
73	12	Jul-15	Chisel	chisel2	2	2.712	8.438	5.726
74	12	Jul-15	Chisel	chisel2	3	1.641	8.102	6.461
75	12	Jul-15	Chisel	chisel2	4	1.266	4.437	3.171
76	31a	Jul-15	Control	control1	1	9.891	14.792	4.901
77	31a	Jul-15	Control	control1	2	11.796	16.878	5.082
78	31a	Jul-15	Control	control1	3	12.435	15.85	3.415
79	31a	Jul-15	Control	control1	4	11.07	13.854	2.784
80	31a	Jul-15	Chisel	chisel1	1	1.93	9.162	7.232
81	31a	Jul-15	Chisel	chisel1	2	0.669	6.63	5.961
82	31a	Jul-15	Chisel	chisel1	3	0.78	6.219	5.439
83	31a	Jul-15	Chisel	chisel1	4	1.152	5.496	4.344
84	31a	Jul-15	Control	control2	1	11.277	19.735	8.458
85	31a	Jul-15	Control	control2	2	5.047	14.298	9.251
86	31a	Jul-15	Control	control2	3	6.225	12.463	6.238
87	31b	Jul-15	Chisel	chisel1	1	5.986	7.873	1.887
88	31b	Jul-15	Chisel	chisel1	2	5.638	8.511	2.873
89	31b	Jul-15	Chisel	chisel1	3	5.307	8.776	3.469
90	31b	Jul-15	Chisel	chisel1	4	4.242	9.143	4.901
91	37a	Jul-15	Chisel	chisel1	1	10.714	13.912	3.198
92	37a	Jul-15	Chisel	chisel1	2	12.173	15.763	3.59
93	37a	Jul-15	Chisel	chisel1	3	10.714	14.864	4.15
94	37a	Jul-15	Chisel	chisel1	4	7.741	10.77	3.029
95	37a	Jul-15	Control	control1	1	5.065	7.487	2.422
96	37a	Jul-15	Control	control1	2	5.424	8.068	2.644
97	37a	Jul-15	Control	control1	3	5.424	8.247	2.823
98	37a	Jul-15	Control	control1	4	5.334	7.535	2.201
100	41	Jul-15	Chisel	chisel1	1	3.922	9.002	5.08
101	41	Jul-15	Chisel	chisel1	2	3.014	7.496	4.482
102	41	Jul-15	Chisel	chisel1	3	2.973	8.681	5.708
103	41	Jul-15	Chisel	chisel1	4	3.428	10.833	7.405
104	41	Jul-15	Control	control1	1	7.044	21.14	14.096
105	41	Jul-15	Control	control1	2	6.734	11.509	4.775
106	41	Jul-15	Control	control1	3	7.082	12.034	4.952
107	41	Jul-15	Control	control1	4	9.767	19.483	9.716
108	51	Jul-15	Chisel	chisel1	1	0.537	5.106	4.569
109	51	Jul-15	Chisel	chisel1	2	1.4	6.541	5.141
110	51	Jul-15	Chisel	chisel1	3	2.018	8.02	6.002
111	51	Jul-15	Chisel	chisel1	4	0.584	5.824	5.24
112	51	Jul-15	Control	control1	1	2.6	5.039	2.439
113	51	Jul-15	Control	control1	2	2.585	4.788	2.203
114	51	Jul-15	Control	control1	3	2.719	5.294	2.575
115	51	Jul-15	Control	control1	4	3.799	5.744	1.945
116	51	Jul-15	Control	control2	1	0.792	7.987	7.195
117	51	Jul-15	Control	control2	2	4.669	11.849	7.18
118	51	Jul-15	Control	control2	3	2.785	9.805	7.02
119	55	Jul-15	Chisel	chisel1	1	1.702	6.562	4.86
120	55	Jul-15	Chisel	chisel1	2	1.524	7.768	6.244
121	55	Jul-15	Chisel	chisel1	3	4.436	8.982	4.546
122	55	Jul-15	Chisel	chisel1	4	4.387	6.72	2.333
123	55	Jul-15	Chisel	chisel2	1	2.557	10.054	7.497
124	55	Jul-15	Chisel	chisel2	2	5.325	10.745	5.42
125	55	Jul-15	Chisel	chisel2	3	3.719	8.721	5.002
126	55	Jul-15	Chisel	chisel2	4	2.509	5.906	3.397
127	56	Jul-15	Chisel	chisel1	1	2.499	13.572	11.073
128	56	Jul-15	Chisel	chisel1	2	6.108	14.37	8.262
129	56	Jul-15	Chisel	chisel1	3	6.136	14.204	8.068
130	56	Jul-15	Chisel	chisel1	4	4.889	14.01	9.121
131	56	Jul-15	Control	control1	1	3.541	10.391	6.85
132	56	Jul-15	Control	control1	2	3.205	12.947	9.742
133	56	Jul-15	Control	control1	3	3.557	12.985	9.428
134	56	Jul-15	Control	control1	4	3.094	14.112	11.018
135	58	Jul-15	Chisel	chisel1	1	4.303	14.566	10.263
136	58	Jul-15	Chisel	chisel1	2	3.386	17.402	14.016
137	58	Jul-15	Chisel	chisel1	3	0	19.217	19.217
138	59	Jul-15	Chisel	chisel1	1	3.21	8.234	5.024
139	59	Jul-15	Chisel	chisel1	2	1.644	6.994	5.35
140	59	Jul-15	Chisel	chisel1	3	2.195	5.86	3.665
141	59	Jul-15	Chisel	chisel1	4	3.409	6.118	2.709
142	59	Jul-15	Control	control1	1	2.707	10.026	7.319
143	59	Jul-15	Control	control1	2	3.253	13.055	9.802
144	59	Jul-15	Control	control1	3	2.7	14.975	12.275
145	59	Jul-15	Control	control1	4	2.438	10.357	7.919
146	60	Jul-15	Chisel	chisel1	1	2.172	3.445	1.273
147	60	Jul-15	Chisel	chisel1	2	3.275	5.445	2.17
148	60	Jul-15	Chisel	chisel1	3	1.335	4.449	3.114
149	105	Jul-15	Chisel	chisel1	1	7.039	6.09	-0.949
150	105	Jul-15	Chisel	chisel1	2	9.808	9.612	-0.196
151	105	Jul-15	Chisel	chisel1	3	10.375	10.319	-0.056
152	105	Jul-15	Chisel	chisel1	4	6.638	10.657	4.019
153	107new	Jul-15	Chisel	chisel1	1	5.541	16.205	10.664
154	107new	Jul-15	Chisel	chisel1	2	5.869	10.329	4.46
155	107new	Jul-15	Chisel	chisel1	3	5.648	15.969	10.321
156	107old	Jul-15	Control	control1	1	5.367	7.367	2
157	107old	Jul-15	Control	control1	2	5.993	7.835	1.842
158	107old	Jul-15	Control	control1	3	6.033	7.401	1.368
159	107old	Jul-15	Control	control1	4	6.002	6.766	0.764
160	107old	Jul-15	Chisel	chisel1	1	6.167	7.255	1.088
161	107old	Jul-15	Chisel	chisel1	2	3.518	5.214	1.696
162	107old	Jul-15	Chisel	chisel1	3	1.086	3.344	2.258
163	107old	Jul-15	Chisel	chisel1	4	3.481	4.692	1.211
164	108	Jul-15	Chisel	chisel1	1	3.844	5.558	1.714
165	108	Jul-15	Chisel	chisel1	2	3.304	5.207	1.903
166	108	Jul-15	Chisel	chisel1	3	3.472	6.612	3.14
167	108	Jul-15	Chisel	chisel1	4	6.287	6.377	0.09
168	108	Jul-15	Chisel	chisel2	1	4.98	5.088	0.108
169	108	Jul-15	Chisel	chisel2	2	5.172	5.46	0.288
170	108	Jul-15	Control	control1	1	6.047	12.043	5.996
171	108	Jul-15	Control	control1	2	8.401	14.042	5.641
172	108	Jul-15	Control	control1	3	10.116	15.476	5.36
173	108	Jul-15	Control	control1	4	9.872	14.404	4.532
174	Shade1	Jul-15	Chisel	chisel1	1	2.938	3.256	0.318
175	Shade1	Jul-15	Chisel	chisel1	2	4.457	6.047	1.59
176	Shade1	Jul-15	Chisel	chisel1	3	5.484	5.615	0.131
177	Shade1	Jul-15	Chisel	chisel1	4	3.892	8.716	4.824
178	Shade1	Jul-15	Chisel	chisel2	1	2.225	9.322	7.097
179	Shade1	Jul-15	Chisel	chisel2	2	4.146	9.845	5.699
180	Shade1	Jul-15	Chisel	chisel2	3	4.355	6.872	2.517
181	Shade1	Jul-15	Chisel	chisel2	4	3.294	5.647	2.353
182	Shade1	Jul-15	Control	control1	1	4.058	9.318	5.26
183	Shade1	Jul-15	Control	control1	2	7.652	10.898	3.246
184	Shade1	Jul-15	Control	control1	3	6.528	11.011	4.483
185	Shade1	Jul-15	Control	control1	4	4.188	10.992	6.804
186	Shade2	Jul-15	Chisel	chisel1	1	2.604	6.334	3.73
187	Shade2	Jul-15	Chisel	chisel1	2	3.255	5.786	2.531
188	Shade2	Jul-15	Chisel	chisel1	3	3.125	6.223	3.098
189	Shade2	Jul-15	Chisel	chisel1	4	2.87	4.706	1.836
190	Shade2	Jul-15	Control	control1	1	7.906	19.821	11.915
191	Shade2	Jul-15	Control	control1	2	6.197	18.096	11.899
192	Shade2	Jul-15	Control	control1	3	7.586	17.796	10.21
193	Shade2	Jul-15	Control	control1	4	8.085	18.119	10.034
194	Shade3	Jul-15	Chisel	chisel1	1	3.247	6.021	2.774
195	Shade3	Jul-15	Chisel	chisel1	2	2.857	6.163	3.306
196	Shade3	Jul-15	Chisel	chisel1	3	2.251	5.637	3.386
197	Shade3	Jul-15	Chisel	chisel1	4	1.158	5.571	4.413
198	Shade3	Jul-15	Chisel	chisel2	1	4.992	16.347	11.355
199	Shade3	Jul-15	Chisel	chisel2	2	5.772	17.801	12.029
200	Shade3	Jul-15	Chisel	chisel2	3	5.179	13.784	8.605
201	Shade3	Jul-15	Chisel	chisel2	4	1.894	14.406	12.512
202	Shade3	Jul-15	Control	control1	1	10.363	22.209	11.846
203	Shade3	Jul-15	Control	control1	2	10.31	25.105	14.795
204	Shade3	Jul-15	Control	control1	3	11.5	24.37	12.87
205	Shade3	Jul-15	Control	control1	4	6.999	22.379	15.38
206	Shade3	Jul-15	Control	control2	1	3.283	9.859	6.576
207	Shade3	Jul-15	Control	control2	2	2.431	11.499	9.068
208	Shade3	Jul-15	Control	control2	3	2.616	12.169	9.553
209	Shade3	Jul-15	Control	control2	4	1.857	12.125	10.268
210	ChiselCoral1	Mar-15	Chisel	Chisel1	1	2.589	10.234	7.645
211	ChiselCoral1	Mar-15	Chisel	Chisel1	2	3.467	9.377	5.91
212	ChiselCoral1	Mar-15	Chisel	Chisel1	3	4.224	8.986	4.762
213	ChiselCoral1	Mar-15	Chisel	Chisel1	4	4.96	5.715	0.755
214	ChiselCoral2	Mar-15	Chisel	Chisel1	1	4.986	11.229	6.243
215	ChiselCoral2	Mar-15	Chisel	Chisel1	2	5.114	12.483	7.369
216	ChiselCoral2	Mar-15	Chisel	Chisel1	3	3.748	9.292	5.544
217	ChiselCoral3	Mar-15	Chisel	Chisel1	1	4.298	8.465	4.167
218	ChiselCoral3	Mar-15	Chisel	Chisel1	2	3.997	7.896	3.899
219	ChiselCoral3	Mar-15	Chisel	Chisel1	3	3.7	7.647	3.947
220	ChiselCoral3	Mar-15	Chisel	Chisel1	4	3.533	6.368	2.835
221	ChiselCoral3	Jul-15	Control	control1	1	1.53	7.102	5.572
222	ChiselCoral3	Jul-15	Control	control1	2	1.862	7.019	5.157
223	ChiselCoral3	Jul-15	Control	control1	3	1.784	6.944	5.16
224	ChiselCoral3	Jul-15	Control	control1	4	2.043	7.464	5.421
